# Supplementary material for: Impact remnants rich in carbonaceous chondrites detected on the Moon by the Chang’e-4 rover
Source: Springer Nature journal article supplement (doi:10.1038/s41550-021-01530-w), 2021-11-25
Supplement: 41550_2021_1530_MOESM1_ESM.pdf [file 41550_2021_1530_MOESM1_ESM.pdf]

**Supplementary information**

---

**Impact remnants rich in carbonaceous  
chondrites detected on the Moon by the  
Chang'e-4 rover**

---

In the format provided by the  
authors and unedited

1  
2  
3  
4  
5  
6  
7  
8  
  
9  
10  
11  
12  
13  
14  
15  
16  
17  
18  
19  
20  
21  
22  
23  
24  
25  
26  
27  
28  
29

Supplementary Information for  
**Impact Remnants Rich in Carbonaceous Chondrites Detected  
on the Moon by the Chang'E-4 Rover**

**Authors:** Yazhou Yang<sup>1</sup>, Shuai Li<sup>2</sup>, Meng-Hua Zhu<sup>3</sup>, Yang Liu<sup>1,4\*</sup>, Bo Wu<sup>5</sup>, Jun Du<sup>6,1</sup>, Wenzhe  
Fa<sup>6,3,4</sup>, Rui Xu<sup>7</sup>, Zhiping He<sup>7</sup>, Chi Wang<sup>1</sup>, Bin Xue<sup>8</sup>, Jianfeng Yang<sup>8</sup>, Yongliao Zou<sup>1</sup>

<sup>1</sup>State Key Laboratory of Space Weather, National Space Science Center, Chinese Academy of  
Sciences, Beijing, China;

<sup>2</sup>Hawai'i Institute of Geophysics and Planetology, University of Hawaii, Honolulu, HI, USA;

<sup>3</sup>State Key Laboratory of Lunar and Planetary Sciences, Macau University of Science and  
Technology, Taipa, Macau, China;

<sup>4</sup>Center for Excellence in Comparative Planetology, Chinese Academy of Sciences, Hefei,  
China;

<sup>5</sup>Department of Land Surveying and Geo-Informatics, The Hong Kong Polytechnic University,  
Hong Kong, China;

<sup>6</sup>Institute of Remote Sensing and Geographical Information System, School of Earth and Space  
Sciences, Peking University, Beijing, China

<sup>7</sup>Key Laboratory of Space Active Opto-Electronics Technology, Shanghai Institute of Technical  
Physics, Chinese Academy of Sciences, Shanghai, China.

<sup>8</sup>Xi'an Institute of Optics and Precision Mechanics, Chinese Academy of Sciences, Xi'an, China

\*Correspondence to: [yangliu@nssc.ac.cn](mailto:yangliu@nssc.ac.cn)

**This PDF file includes:**

Supplementary Figures 1 to 4

Supplementary Tables 1 to 11.

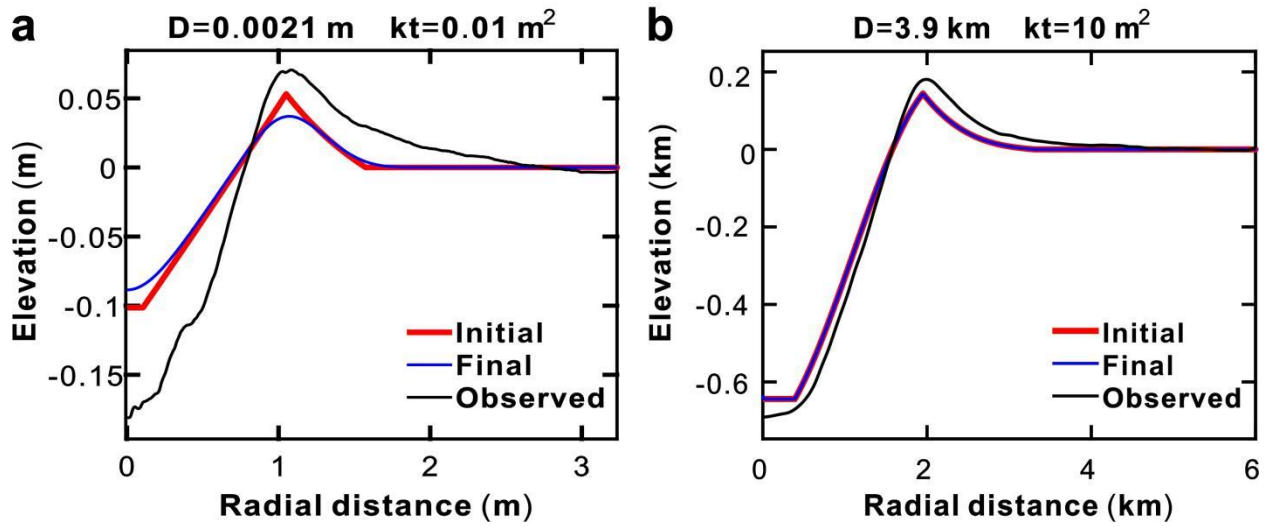

30

31 **Supplementary Fig. 1.**

32 The measured and modeled radial elevation profiles for (a) the small fresh crater observed on Day  
 33 9 and (b) the Zhinyu crater (right). Black lines are the observed profiles obtained from the DEM  
 34 (Fig. 4a) data and <https://quickmap.lroc.asu.edu/>, respectively. The red lines are the initial profiles  
 35 set for the degradation model, and blue lines represent the best-fit results. The observed profiles  
 36 are not well fitted, because these two craters are younger than those fresh craters (~1 Ma) we used  
 37 to build the crater degradation-age model (*ref. 22, 23*). Therefore, the age of the small crater and  
 38 Zhinyu crater might be less than 1 Ma.

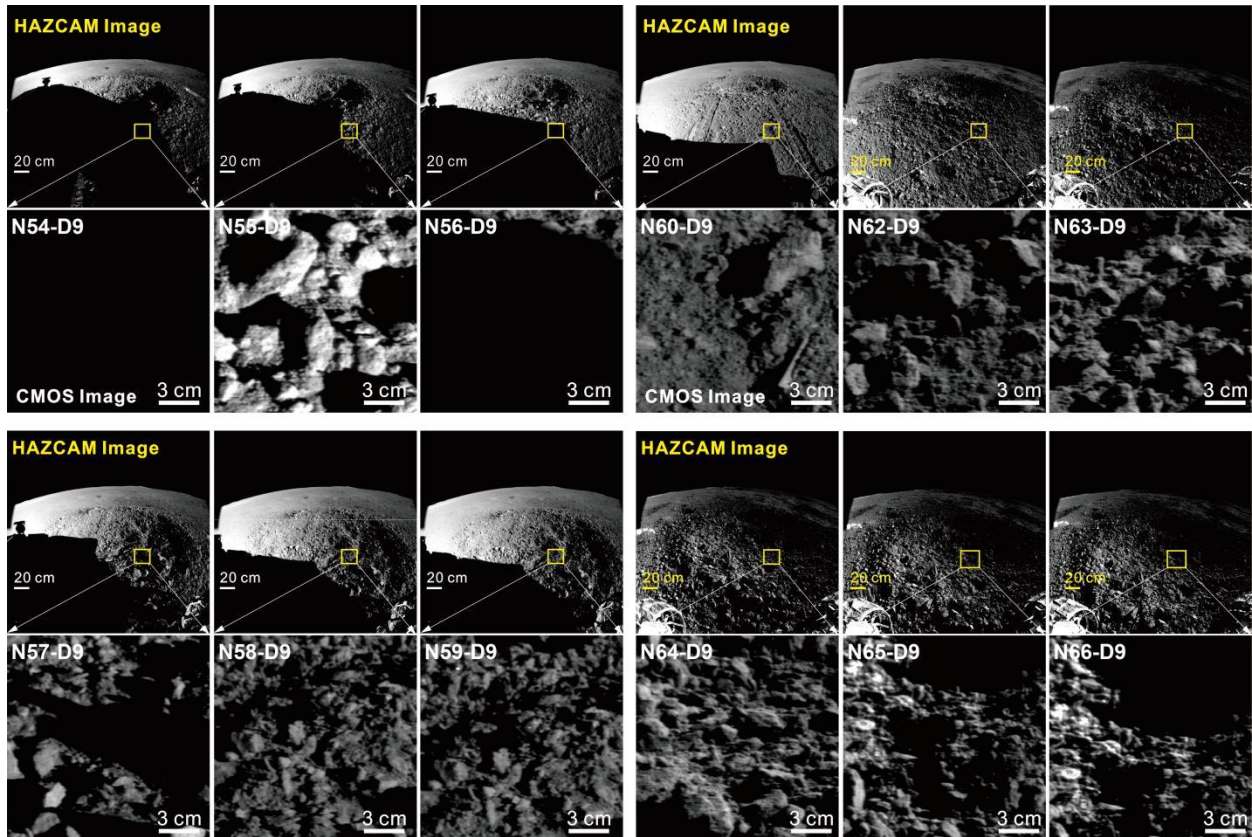

39

40 **Supplementary Fig. 2.**

41 HAZCAM image and enlarged CMOS image for each VNIS measurement site around the small  
42 crater. The yellow boxes in HAZCAM images indicate the areas imaged by the CMOS camera.

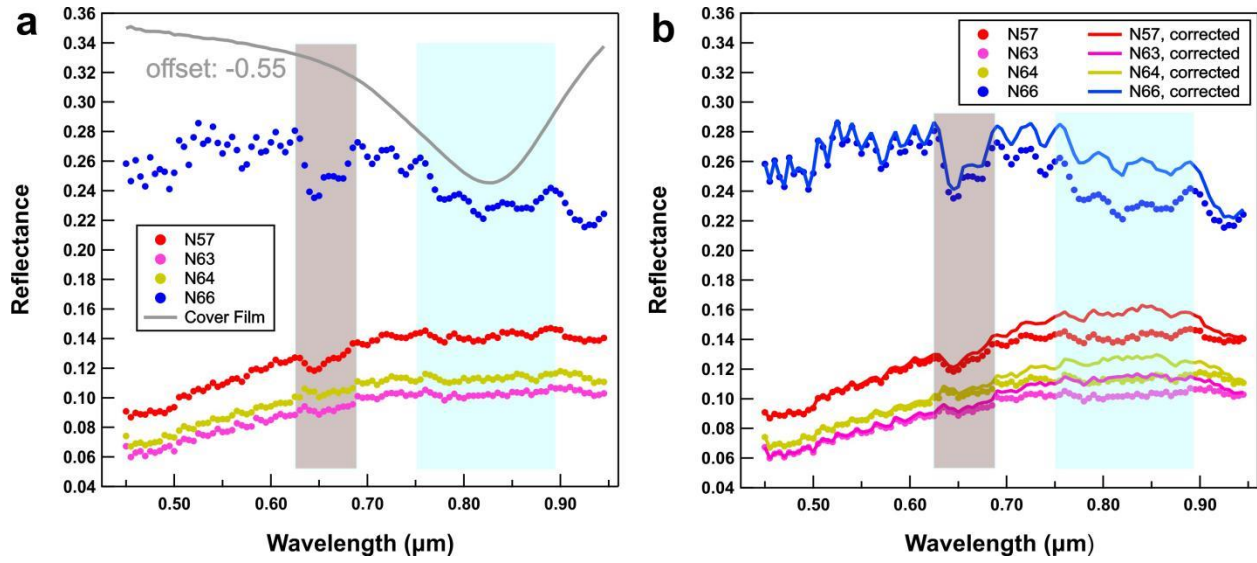

43

44 **Supplementary Fig. 3**

45 (a) Original CMOS spectra of the four ROIs in N66, N64, N63, and N57, and the reflectance  
 46 spectra of a film material which is the same as the cover material of the Yutu-2 rover. (b) The  
 47 CMOS spectra of the four ROIs before and after correction.  
 48

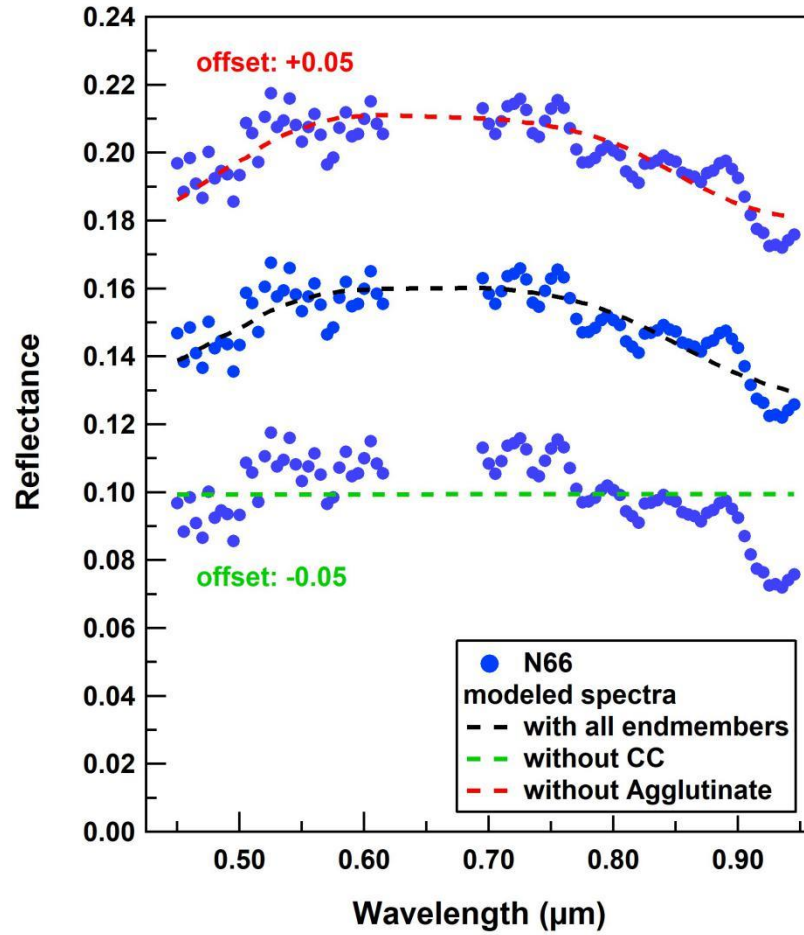

49

50 **Supplementary Fig. 4.**

51 Reflectance spectra of N66 ROI (corrected to standard angles, see Methods) and unmixing results  
 52 of three tests: (1) with all endmembers used; (2) only excluding the CC endmember; (3) only  
 53 excluding the agglutinate endmember. The model fails to reproduce the Chang'E-4 spectra without  
 54 the CC endmember (the green dashed line).

55 **Supplementary Table 1.**  
56 Sample information for selected endmember spectra.

| Endmember   | RELAB Spectra l File ID | Composition in solid solution (%) <sup>*</sup> | Particle size (μm) | Refractive index ( <i>n</i> ) | Origin                                     | References          |
|-------------|-------------------------|------------------------------------------------|--------------------|-------------------------------|--------------------------------------------|---------------------|
| Olivine     | c1lr212                 | Fo34.8                                         | <45                | 1.83                          | Apollo 15555, 965                          |                     |
| OPX         | c1lr209                 | En51.3;<br>Fs40.9;<br>Wo7.8                    | <45                | 1.77                          | Apollo 15058, 276,<br>green pyroxene       | (16, 48, 69)        |
| CPX1        | c1lr208                 | En23.0;<br>Fs54.9;<br>Wo22.2                   | <45                | 1.73                          | Apollo 15058, 276,<br>brown pyroxene       | (16, 48, 69)        |
| CPX2        | c1lr213                 | En40.3;<br>Fs44.7;<br>Wo15.0                   | <45                |                               | Apollo 15555, 965,<br>light-brown pyroxene | (16, 48, 69)        |
| CPX3        | c1lr215                 | En33.3;<br>Fs32.6;<br>Wo34.2                   | <45                |                               | Apollo 70017, 535,<br>deep-brown pyroxene  | (16, 48, 69)        |
| CPX4        | c1lr219                 | En37.1;<br>Fs31.0;<br>Wo31.9                   | <45                |                               | Apollo 70035, 188,<br>dark-brown pyroxene  | (16, 48, 69)        |
| Plagioclase | c1lr223                 | An94.2                                         | <45                | 1.56                          | Apollo 62241, 21                           | (16, 48, 69)        |
| Ilmenite    | c1lr222                 | --                                             | <45                | 2.13                          | Apollo 70035, 188                          | (16, 48)            |
| Agglutinate | c1lu07                  | --                                             | 100-<br>1000       | 1.49                          | Separate from LUNA<br>20                   | (16)                |
| Glass1      | c1lr51                  | Fo40.1;<br>An:92.1                             | 15 <sup>#</sup>    | 1.64                          | Apollo 74220, 806,<br>orange glass         | (16, 69, 70,<br>71) |
| Glass2      | c1lr52                  | Fo47.1;<br>An98.3                              | 15 <sup>#</sup>    | 1.64                          | Apollo 15401, 136,<br>green glass          | (16, 69, 70,<br>71) |
| Glass3      | c1lr50                  | --                                             | 15 <sup>#</sup>    | 1.64                          | Apollo 74001, 439,<br>black spherules      | (16, 69, 70,<br>71) |
| CC          | c1mb77                  |                                                | <125               | 1.93**                        | Y-693, CK                                  | (30)                |

57 \*Fo: Mg number defined as molar Mg/(Mg+Fe); En, Fs, and Wo represent the three typical  
58 pyroxene end-members of enstatite (Mg<sub>2</sub>Si<sub>2</sub>O<sub>6</sub>), ferrosilite(Fe<sub>2</sub>Si<sub>2</sub>O<sub>6</sub>), and wollastonite(Ca<sub>2</sub>Si<sub>2</sub>O<sub>6</sub>),  
59 respectively; An represents the typical end-member of anorthite (CaAl<sub>2</sub>Si<sub>2</sub>O<sub>8</sub>).

60 #: No particle size is recorded in the RELAB database. A mean particle size 15 μm is assumed  
61 based on the fact that the optical property lunar surface is dominated by particles at the 10-20 μm  
62 group (*ref. 69, 70*).

63 \*\*: Estimated by weighting the *n* of the individual mineral (*n<sub>i</sub>*) by their relative abundance (*F<sub>i</sub>*):  
64  $\bar{n} = \sum n_i F_i$  (*ref. 72*). The modal abundances of Y693 are 2.1 vol.% pyroxene, 63.5 vol.% olivine,  
65 11.5 vol.% plagioclase, and 22.9 vol.% opaque minerals (*ref. 30*). The opaque phases mainly  
66 composed of magnetite with *n*=2.42 (*ref. 73*).

67

68 **Supplementary Table 2.**  
 69 Similarities between spectra of N66 and selected end-members.

| End-member               | Spectral Angle (°) |                   |
|--------------------------|--------------------|-------------------|
| <b>CC_c1mb77</b>         | <b>2.82894</b>     | <b>High</b>       |
| <b>GreenGlass_c1lr52</b> | <b>3.83309</b>     |                   |
| PLG_c1lr223              | 4.47412            |                   |
| Agg_c1lu07               | 6.92018            | <b>Similarity</b> |
| OLV_c1lr212              | 8.83722            |                   |
| CPX_c1lr215              | 10.3345            |                   |
| OPX_c1lr209              | 11.0578            |                   |
| CPX_c1lr208              | 12.5044            |                   |
| CPX_c1lr219              | 12.6118            |                   |
| CPX_c1lr213              | 12.8784            | <b>Low</b>        |
| OrangeGlass_c1lr51       | 16.8984            |                   |
| ILM_c1lr222              | 17.2281            |                   |
| BlackSpherules_c1lr50    | 23.679             |                   |

70



71 **Supplementary Table 3.**72 Modeled mineral abundances for ROIs of N66, N64, N63, and N57 which are marked out in Fig.  
73 1d.

| End-member*                     | Modeled Abundance (wt. %)<br>(particle size: 0-75 $\mu\text{m}$ ) |           |           |           |
|---------------------------------|-------------------------------------------------------------------|-----------|-----------|-----------|
|                                 | N57                                                               | N63       | N64       | N66       |
| <b>Olivine</b>                  | 0                                                                 | 9         | 3         | 8         |
| <b>Pyroxene**</b>               | <b>47</b>                                                         | <b>40</b> | <b>43</b> | <b>0</b>  |
| OPX                             | 0                                                                 | 6         | 0         | 0         |
| CPX1                            | 0                                                                 | 9         | 1         | 0         |
| CPX2                            | 0                                                                 | 6         | 0         | 0         |
| CPX3                            | 40                                                                | 10        | 30        | 0         |
| CPX4                            | 7                                                                 | 10        | 12        | 0         |
| <b>Plagioclase</b>              | <b>0</b>                                                          | <b>5</b>  | <b>2</b>  | <b>0</b>  |
| <b>Ilmenite</b>                 | <b>0</b>                                                          | <b>0</b>  | <b>0</b>  | <b>0</b>  |
| <b>Glasses***</b>               | <b>50</b>                                                         | <b>34</b> | <b>45</b> | <b>45</b> |
| Glass1                          | 3                                                                 | 8         | 0         | 0         |
| Glass2                          | 14                                                                | 12        | 12        | 0         |
| Glass3                          | 33                                                                | 11        | 31        | 44        |
| Agglutinate                     | 0                                                                 | 4         | 3         | 0         |
| <b>CC (Y-693)</b>               | <b>2</b>                                                          | <b>11</b> | <b>6</b>  | <b>47</b> |
| <b>npFe<sup>0</sup> (vol.%)</b> | 0.20                                                              | 0.35      | 0.25      | 0.00      |

74 \*See Supplementary Table 1 for detail information about these spectral endmembers.

75 \*\*Pyroxene: including OPX and four CPX.

76 \*\*\*Glasses: including green glass, orange glass, black spherules, and agglutinate.

77 **Supplementary Table 4.**78 Modeled mineral abundances for ROIs of N60, N55, N16, and N15 which are marked out in  
79 Extended Data Fig. 10.

| End-member*                     | Modeled Abundance (wt. %)<br>(particle size: 0-75 $\mu\text{m}$ ) |           |           |           |
|---------------------------------|-------------------------------------------------------------------|-----------|-----------|-----------|
|                                 | N65                                                               | N60       | N55       | N15       |
| <b>Olivine</b>                  | 14                                                                | 5         | 7         | 8         |
| Pyroxene**                      | <b>0</b>                                                          | <b>61</b> | <b>56</b> | <b>41</b> |
| OPX                             | 0                                                                 | 6         | 7         | 6         |
| CPX1                            | 0                                                                 | 10        | 11        | 7         |
| CPX2                            | 0                                                                 | 10        | 9         | 4         |
| CPX3                            | 0                                                                 | 16        | 14        | 12        |
| CPX4                            | 0                                                                 | 19        | 15        | 12        |
| <b>Plagioclase</b>              | <b>0</b>                                                          | <b>7</b>  | <b>8</b>  | <b>8</b>  |
| <b>Ilmenite</b>                 | <b>0</b>                                                          | <b>1</b>  | <b>0</b>  | <b>0</b>  |
| <b>Glasses***</b>               | <b>71</b>                                                         | <b>19</b> | <b>22</b> | <b>34</b> |
| Glass1                          | 4                                                                 | 7         | 7         | 8         |
| Glass2                          | 47                                                                | 0         | 3         | 7         |
| Glass3                          | 20                                                                | 9         | 6         | 11        |
| Agglutinate                     | 0                                                                 | 3         | 7         | 7         |
| <b>CC (Y-693)</b>               | <b>15</b>                                                         | <b>6</b>  | <b>6</b>  | <b>8</b>  |
| <b>npFe<sup>0</sup> (vol.%)</b> | 0.00                                                              | 0.40      | 0.16      | 0.11      |

80 \*See Supplementary Table 1 for detailed information about these spectral end-members.

81 \*\*Pyroxene: including OPX and all CPX.

82 \*\*\*Glasses: including orange glass, green glass, black spherules, and agglutinate.

83 **Supplementary Table 5.**

84 Topography profiles along four different directions.

| <b>Profile</b> | <b>Crater depth (m)</b> | <b>Crater diameter (m)</b> | <b>Ratio:<br/>depth/diameter</b> |
|----------------|-------------------------|----------------------------|----------------------------------|
| <b>A-A'</b>    | 0.343                   | 2.129                      | 0.16                             |
| <b>B-B'</b>    | 0.385                   | 1.883                      | 0.20                             |
| <b>C-C'</b>    | 0.347                   | 1.997                      | 0.17                             |
| <b>D-D'</b>    | 0.371                   | 2.110                      | 0.18                             |

85

86 **Supplementary Table 6.**

87 The ten CC spectra that have the highest similarities with the spectra of the observed “glassy”  
 88 material at N66.

| No.      | RELAB File ID | Spectral angle (°) | Type         | Meteorite name | Grain size (μm)   | Viewing geometry (i°, e°) | Weathering Index |
|----------|---------------|--------------------|--------------|----------------|-------------------|---------------------------|------------------|
| 1        | c1lm17        | 2.27305            | CK6          | LEW87009,4     | powder, unsorted? | 30/0                      | 1                |
| 2        | c1mp05        | 2.32317            | CK6          | LEW87009,4     | <63 (?)           | 30/0                      | 1                |
| 3        | c1mb88        | 2.45121            | CK6          | LEW87009,28    | <125              | 30/0                      | 1                |
| 4        | c1mp04        | 2.70066            | CK5-6        | EET87860,5     | <63 (?)           | 30/0                      | 1                |
| 5        | c2mb81        | 2.70499            | CK4          | ALH85002,25    | <125              | 30/0                      | 1                |
| 6        | c1mp55        | 2.80362            | CM or CV     | A-881655       | <125              | 30/0                      | unknown          |
| 7        | cdmb81        | 2.81142            | CK4          | ALH85002,25    | 75-125            | 30/0                      | 1                |
| <b>8</b> | <b>c1mb77</b> | <b>2.82894</b>     | <b>CK4/5</b> | <b>Y-693</b>   | <b>&lt;125</b>    | <b>30/0</b>               | <b>0</b>         |
| 9        | c1lm19        | 2.85155            | CK5-6        | EET87860,5     | powder; unsorted? | 30/0                      | 1                |
| 10       | cbmh58        | 2.88285            | CK4          | ALH85002,34    | <180              | 30/0                      | 1                |

89 *Note:* Here only the ten most similar CC spectra are listed, the comparison results of all 183 CC  
 90 spectra are saved as a separate Excel file titled “*Supplementary\_Tables\_7\_10\_11.xlsx*” in the  
 91 supporting material. The weathering index represents the degree of terrestrial alteration, a value of  
 92 0 means the meteorite is pristine (*ref. 30*).  
 93

- 94 **Supplementary Table 7.**  
95 Similarities between spectra of N66 and different carbonaceous chondrite samples  
96 This table is provided in a separate excel file, see additional supplementary files.

97 **Supplementary Table 8.**98 Incidence, emission, and phase angles of the ROIs shown in Figure 1c and Extended Data Fig.  
99 10.

| <b>Site No.</b> | <b>Incidence Angle (deg.)</b> | <b>Emission Angle (deg.)</b> | <b>Phase Angle (deg.)</b> |
|-----------------|-------------------------------|------------------------------|---------------------------|
| <b>N66</b>      | 71.0                          | 50.0                         | 98.9                      |
| <b>N64</b>      | 68.8                          | 45.7                         | 93.4                      |
| <b>N63</b>      | 67.8                          | 45.8                         | 92.3                      |
| <b>N57</b>      | 65.4                          | 46.7                         | 43.1                      |
| <b>N65</b>      | 70.0                          | 51.8                         | 98.5                      |
| <b>N60</b>      | 58.4                          | 48.4                         | 47.9                      |
| <b>N55</b>      | 73.4                          | 48.2                         | 44.6                      |
| <b>N15</b>      | 63.4                          | 43.8                         | 63.4                      |

100

101 **Supplementary Table 9.**

102 The IDs for the Chang'E-4 spectral and image data used in this work. These data are archived at  
 103 [http://moon.bao.ac.cn/searchOrder\\_pdsData.search](http://moon.bao.ac.cn/searchOrder_pdsData.search)

| Data                                              | Data ID                                                        |                                                   |
|---------------------------------------------------|----------------------------------------------------------------|---------------------------------------------------|
| <b>Spectra data</b>                               | CE4_GRAS_VNIS-VD_SCI_N_20190825003001_20190825053000_0054_B.2B |                                                   |
|                                                   | CE4_GRAS_VNIS-VD_SCI_N_20190825053001_20190825080000_0055_B.2B |                                                   |
|                                                   | CE4_GRAS_VNIS-VD_SCI_N_20190826010001_20190826060000_0056_B.2B |                                                   |
|                                                   | CE4_GRAS_VNIS-VD_SCI_N_20190826070001_20190826083000_0057_B.2B |                                                   |
|                                                   | CE4_GRAS_VNIS-VD_SCI_N_20190827000001_20190827020000_0058_B.2B |                                                   |
|                                                   | CE4_GRAS_VNIS-VD_SCI_N_20190827030001_20190827053000_0059_B.2B |                                                   |
|                                                   | CE4_GRAS_VNIS-VD_SCI_N_20190827060001_20190827100000_0060_B.2B |                                                   |
|                                                   | CE4_GRAS_VNIS-VD_SCI_N_20190903143001_20190903150000_0062_B.2B |                                                   |
|                                                   | CE4_GRAS_VNIS-VD_SCI_N_20190904010001_20190904040000_0063_B.2B |                                                   |
|                                                   | CE4_GRAS_VNIS-VD_SCI_N_20190904053001_20190904073000_0064_B.2B |                                                   |
|                                                   | CE4_GRAS_VNIS-VD_SCI_N_20190904093001_20190904113000_0065_B.2B |                                                   |
|                                                   | CE4_GRAS_VNIS-VD_SCI_N_20190904130001_20190904140000_0066_B.2B |                                                   |
|                                                   | CE4_GRAS_VNIS-VD_SCI_N_20190302060001_20190302131100_0015_A.2B |                                                   |
|                                                   | <b>Fig.1a<br/>PCAM data</b>                                    | CE4_GRAS_PCAML-C-                                 |
|                                                   |                                                                | 008_SCI_N_20190925032918_20190925032918_0076_B.2B |
| CE4_GRAS_PCAML-C-                                 |                                                                |                                                   |
| 009_SCI_N_20190925033038_20190925033038_0076_B.2B |                                                                |                                                   |
| CE4_GRAS_PCAML-C-                                 |                                                                |                                                   |
| 010_SCI_N_20190925033158_20190925033158_0076_B.2B |                                                                |                                                   |
| CE4_GRAS_PCAML-C-                                 |                                                                |                                                   |
| 011_SCI_N_20190925033318_20190925033318_0076_B.2B |                                                                |                                                   |
| CE4_GRAS_PCAML-C-                                 |                                                                |                                                   |
| 012_SCI_N_20190925033438_20190925033438_0076_B.2B |                                                                |                                                   |
| CE4_GRAS_PCAML-C-                                 |                                                                |                                                   |
| 013_SCI_N_20190925033558_20190925033558_0076_B.2B |                                                                |                                                   |
| CE4_GRAS_PCAML-C-                                 |                                                                |                                                   |
| 020_SCI_N_20190925035057_20190925035057_0076_B.2B |                                                                |                                                   |
| CE4_GRAS_PCAML-C-                                 |                                                                |                                                   |
| 021_SCI_N_20190925035217_20190925035217_0076_B.2B |                                                                |                                                   |
| CE4_GRAS_PCAML-C-                                 |                                                                |                                                   |
| 022_SCI_N_20190925035337_20190925035337_0076_B.2B |                                                                |                                                   |
| CE4_GRAS_PCAML-C-                                 |                                                                |                                                   |
| 023_SCI_N_20190925035457_20190925035457_0076_B.2B |                                                                |                                                   |
| CE4_GRAS_PCAML-C-                                 |                                                                |                                                   |
| 024_SCI_N_20190925035617_20190925035617_0076_B.2B |                                                                |                                                   |
| CE4_GRAS_PCAML-C-                                 |                                                                |                                                   |
| 025_SCI_N_20190925035737_20190925035737_0076_B.2B |                                                                |                                                   |
| CE4_GRAS_PCAML-C-                                 |                                                                |                                                   |
| 026_SCI_N_20190925035857_20190925035857_0076_B.2B |                                                                |                                                   |
| CE4_GRAS_PCAML-C-                                 |                                                                |                                                   |
| 027_SCI_N_20190925040017_20190925040017_0076_B.2B |                                                                |                                                   |
| CE4_GRAS_PCAML-C-                                 |                                                                |                                                   |
| 036_SCI_N_20190925042323_20190925042323_0076_B.2B |                                                                |                                                   |
| CE4_GRAS_PCAML-C-                                 |                                                                |                                                   |
| 037_SCI_N_20190925042443_20190925042443_0076_B.2B |                                                                |                                                   |
| CE4_GRAS_PCAML-C-                                 |                                                                |                                                   |
| 038_SCI_N_20190925042603_20190925042603_0076_B.2B |                                                                |                                                   |
| CE4_GRAS_PCAML-C-                                 |                                                                |                                                   |

|                                      |                                                                                                                                                                                                                                                                                                                                                                                                                                                                                                                                                                                                                                                                                                                                                                                                                                                                      |
|--------------------------------------|----------------------------------------------------------------------------------------------------------------------------------------------------------------------------------------------------------------------------------------------------------------------------------------------------------------------------------------------------------------------------------------------------------------------------------------------------------------------------------------------------------------------------------------------------------------------------------------------------------------------------------------------------------------------------------------------------------------------------------------------------------------------------------------------------------------------------------------------------------------------|
|                                      | <p>039_SCI_N_20190925042723_20190925042723_0076_B.2B<br/> CE4_GRAS_PCAML-C-<br/> 040_SCI_N_20190925042843_20190925042843_0076_B.2B<br/> CE4_GRAS_PCAML-C-<br/> 041_SCI_N_20190925043003_20190925043003_0076_B.2B<br/> CE4_GRAS_PCAML-C-<br/> 048_SCI_N_20190925044857_20190925044857_0076_B.2B<br/> CE4_GRAS_PCAML-C-<br/> 049_SCI_N_20190925045017_20190925045017_0076_B.2B<br/> CE4_GRAS_PCAML-C-<br/> 050_SCI_N_20190925045137_20190925045137_0076_B.2B<br/> CE4_GRAS_PCAML-C-<br/> 051_SCI_N_20190925045257_20190925045257_0076_B.2B<br/> CE4_GRAS_PCAML-C-<br/> 052_SCI_N_20190925045417_20190925045417_0076_B.2B<br/> CE4_GRAS_PCAML-C-<br/> 053_SCI_N_20190925045537_20190925045537_0076_B.2B<br/> CE4_GRAS_PCAML-C-<br/> 054_SCI_N_20190925045657_20190925045657_0076_B.2B<br/> CE4_GRAS_PCAML-C-<br/> 055_SCI_N_20190925045817_20190925045817_0076_B.2B</p> |
| <p><b>Fig.1b<br/> PCAM data</b></p>  | <p>CE4_GRAS_PCAML-C-<br/> 000_SCI_N_20190827094241_20190827094241_0060_B.2B<br/> CE4_GRAS_PCAML-C-<br/> 001_SCI_N_20190827094410_20190827094410_0060_B.2B<br/> CE4_GRAS_PCAML-C-<br/> 002_SCI_N_20190827094539_20190827094539_0060_B.2B<br/> CE4_GRAS_PCAML-C-<br/> 003_SCI_N_20190827094707_20190827094707_0060_B.2B<br/> CE4_GRAS_PCAML-C-<br/> 004_SCI_N_20190827094836_20190827094836_0060_B.2B<br/> CE4_GRAS_PCAML-C-<br/> 005_SCI_N_20190827095005_20190827095005_0060_B.2B</p>                                                                                                                                                                                                                                                                                                                                                                                |
| <p><b>Fig. 4a<br/> PCAM data</b></p> | <p>CE4_GRAS_PCAML-C-<br/> 000_SCI_N_20190925031838_20190925031838_0076_B.2B<br/> CE4_GRAS_PCAML-C-<br/> 001_SCI_N_20190925031958_20190925031958_0076_B.2B<br/> CE4_GRAS_PCAML-C-<br/> 002_SCI_N_20190925032118_20190925032118_0076_B.2B<br/> CE4_GRAS_PCAML-C-<br/> 003_SCI_N_20190925032238_20190925032238_0076_B.2B<br/> CE4_GRAS_PCAML-C-<br/> 004_SCI_N_20190925032358_20190925032358_0076_B.2B<br/> CE4_GRAS_PCAML-C-<br/> 005_SCI_N_20190925032518_20190925032518_0076_B.2B<br/> CE4_GRAS_PCAML-C-<br/> 006_SCI_N_20190925032638_20190925032638_0076_B.2B<br/> CE4_GRAS_PCAML-C-<br/> 007_SCI_N_20190925032758_20190925032758_0076_B.2B<br/> CE4_GRAS_PCAML-C-<br/> 008_SCI_N_20190925032918_20190925032918_0076_B.2B<br/> CE4_GRAS_PCAML-C-</p>                                                                                                               |



|                                                                        |
|------------------------------------------------------------------------|
| 009_SCI_N_20190925033038_20190925033038_0076_B.2B<br>CE4_GRAS_PCAML-C- |
| 010_SCI_N_20190925033158_20190925033158_0076_B.2B<br>CE4_GRAS_PCAML-C- |
| 011_SCI_N_20190925033318_20190925033318_0076_B.2B<br>CE4_GRAS_PCAML-C- |
| 012_SCI_N_20190925033438_20190925033438_0076_B.2B<br>CE4_GRAS_PCAML-C- |
| 013_SCI_N_20190925033558_20190925033558_0076_B.2B<br>CE4_GRAS_PCAML-C- |
| 014_SCI_N_20190925034257_20190925034257_0076_B.2B<br>CE4_GRAS_PCAML-C- |
| 015_SCI_N_20190925034417_20190925034417_0076_B.2B<br>CE4_GRAS_PCAML-C- |
| 016_SCI_N_20190925034537_20190925034537_0076_B.2B<br>CE4_GRAS_PCAML-C- |
| 017_SCI_N_20190925034657_20190925034657_0076_B.2B<br>CE4_GRAS_PCAML-C- |
| 018_SCI_N_20190925034817_20190925034817_0076_B.2B<br>CE4_GRAS_PCAML-C- |
| 019_SCI_N_20190925034937_20190925034937_0076_B.2B<br>CE4_GRAS_PCAML-C- |
| 020_SCI_N_20190925035057_20190925035057_0076_B.2B<br>CE4_GRAS_PCAML-C- |
| 021_SCI_N_20190925035217_20190925035217_0076_B.2B<br>CE4_GRAS_PCAML-C- |
| 022_SCI_N_20190925035337_20190925035337_0076_B.2B<br>CE4_GRAS_PCAML-C- |
| 023_SCI_N_20190925035457_20190925035457_0076_B.2B<br>CE4_GRAS_PCAML-C- |
| 024_SCI_N_20190925035617_20190925035617_0076_B.2B<br>CE4_GRAS_PCAML-C- |
| 025_SCI_N_20190925035737_20190925035737_0076_B.2B<br>CE4_GRAS_PCAML-C- |
| 026_SCI_N_20190925035857_20190925035857_0076_B.2B<br>CE4_GRAS_PCAML-C- |
| 027_SCI_N_20190925040017_20190925040017_0076_B.2B<br>CE4_GRAS_PCAML-C- |
| 028_SCI_N_20190925040933_20190925040933_0076_B.2B<br>CE4_GRAS_PCAML-C- |
| 029_SCI_N_20190925041403_20190925041403_0076_B.2B<br>CE4_GRAS_PCAML-C- |
| 030_SCI_N_20190925041523_20190925041523_0076_B.2B<br>CE4_GRAS_PCAML-C- |
| 031_SCI_N_20190925041643_20190925041643_0076_B.2B<br>CE4_GRAS_PCAML-C- |
| 032_SCI_N_20190925041803_20190925041803_0076_B.2B<br>CE4_GRAS_PCAML-C- |
| 033_SCI_N_20190925041923_20190925041923_0076_B.2B<br>CE4_GRAS_PCAML-C- |
| 034_SCI_N_20190925042043_20190925042043_0076_B.2B<br>CE4_GRAS_PCAML-C- |
| 035_SCI_N_20190925042203_20190925042203_0076_B.2B                      |

|  |                                                                                                                                                                                                                                                                                                                                                                                                                                                                                                                                                                                                                                                                                                                                                                                                                                                                                                                                                                                                                                                                                                                                                                                                                                                                                                                                                                                                                                                                                                                                                                                                                                                                                                                                                                                                                                                                                                                                                                                                                       |
|--|-----------------------------------------------------------------------------------------------------------------------------------------------------------------------------------------------------------------------------------------------------------------------------------------------------------------------------------------------------------------------------------------------------------------------------------------------------------------------------------------------------------------------------------------------------------------------------------------------------------------------------------------------------------------------------------------------------------------------------------------------------------------------------------------------------------------------------------------------------------------------------------------------------------------------------------------------------------------------------------------------------------------------------------------------------------------------------------------------------------------------------------------------------------------------------------------------------------------------------------------------------------------------------------------------------------------------------------------------------------------------------------------------------------------------------------------------------------------------------------------------------------------------------------------------------------------------------------------------------------------------------------------------------------------------------------------------------------------------------------------------------------------------------------------------------------------------------------------------------------------------------------------------------------------------------------------------------------------------------------------------------------------------|
|  | CE4_GRAS_PCAML-C-<br>036_SCI_N_20190925042323_20190925042323_0076_B.2B<br>CE4_GRAS_PCAML-C-<br>037_SCI_N_20190925042443_20190925042443_0076_B.2B<br>CE4_GRAS_PCAML-C-<br>038_SCI_N_20190925042603_20190925042603_0076_B.2B<br>CE4_GRAS_PCAML-C-<br>039_SCI_N_20190925042723_20190925042723_0076_B.2B<br>CE4_GRAS_PCAML-C-<br>040_SCI_N_20190925042843_20190925042843_0076_B.2B<br>CE4_GRAS_PCAML-C-<br>041_SCI_N_20190925043003_20190925043003_0076_B.2B<br>CE4_GRAS_PCAML-C-<br>042_SCI_N_20190925044057_20190925044057_0076_B.2B<br>CE4_GRAS_PCAML-C-<br>043_SCI_N_20190925044217_20190925044217_0076_B.2B<br>CE4_GRAS_PCAML-C-<br>044_SCI_N_20190925044337_20190925044337_0076_B.2B<br>CE4_GRAS_PCAML-C-<br>045_SCI_N_20190925044457_20190925044457_0076_B.2B<br>CE4_GRAS_PCAML-C-<br>046_SCI_N_20190925044617_20190925044617_0076_B.2B<br>CE4_GRAS_PCAML-C-<br>047_SCI_N_20190925044737_20190925044737_0076_B.2B<br>CE4_GRAS_PCAML-C-<br>048_SCI_N_20190925044857_20190925044857_0076_B.2B<br>CE4_GRAS_PCAML-C-<br>049_SCI_N_20190925045017_20190925045017_0076_B.2B<br>CE4_GRAS_PCAML-C-<br>050_SCI_N_20190925045137_20190925045137_0076_B.2B<br>CE4_GRAS_PCAML-C-<br>051_SCI_N_20190925045257_20190925045257_0076_B.2B<br>CE4_GRAS_PCAML-C-<br>052_SCI_N_20190925045417_20190925045417_0076_B.2B<br>CE4_GRAS_PCAML-C-<br>053_SCI_N_20190925045537_20190925045537_0076_B.2B<br>CE4_GRAS_PCAML-C-<br>054_SCI_N_20190925045657_20190925045657_0076_B.2B<br>CE4_GRAS_PCAML-C-<br>055_SCI_N_20190925045817_20190925045817_0076_B.2B<br>CE4_GRAS_PCAMR-C-<br>000_SCI_N_20190925031823_20190925031823_0076_B.2B<br>CE4_GRAS_PCAMR-C-<br>001_SCI_N_20190925031943_20190925031943_0076_B.2B<br>CE4_GRAS_PCAMR-C-<br>002_SCI_N_20190925032103_20190925032103_0076_B.2B<br>CE4_GRAS_PCAMR-C-<br>003_SCI_N_20190925032223_20190925032223_0076_B.2B<br>CE4_GRAS_PCAMR-C-<br>004_SCI_N_20190925032343_20190925032343_0076_B.2B<br>CE4_GRAS_PCAMR-C-<br>005_SCI_N_20190925032503_20190925032503_0076_B.2B<br>CE4_GRAS_PCAMR-C- |
|--|-----------------------------------------------------------------------------------------------------------------------------------------------------------------------------------------------------------------------------------------------------------------------------------------------------------------------------------------------------------------------------------------------------------------------------------------------------------------------------------------------------------------------------------------------------------------------------------------------------------------------------------------------------------------------------------------------------------------------------------------------------------------------------------------------------------------------------------------------------------------------------------------------------------------------------------------------------------------------------------------------------------------------------------------------------------------------------------------------------------------------------------------------------------------------------------------------------------------------------------------------------------------------------------------------------------------------------------------------------------------------------------------------------------------------------------------------------------------------------------------------------------------------------------------------------------------------------------------------------------------------------------------------------------------------------------------------------------------------------------------------------------------------------------------------------------------------------------------------------------------------------------------------------------------------------------------------------------------------------------------------------------------------|

|  |                                                                        |
|--|------------------------------------------------------------------------|
|  | 006_SCI_N_20190925032623_20190925032623_0076_B.2B<br>CE4_GRAS_PCAMR-C- |
|  | 007_SCI_N_20190925032743_20190925032743_0076_B.2B<br>CE4_GRAS_PCAMR-C- |
|  | 008_SCI_N_20190925032903_20190925032903_0076_B.2B<br>CE4_GRAS_PCAMR-C- |
|  | 009_SCI_N_20190925033023_20190925033023_0076_B.2B<br>CE4_GRAS_PCAMR-C- |
|  | 010_SCI_N_20190925033143_20190925033143_0076_B.2B<br>CE4_GRAS_PCAMR-C- |
|  | 011_SCI_N_20190925033303_20190925033303_0076_B.2B<br>CE4_GRAS_PCAMR-C- |
|  | 012_SCI_N_20190925033423_20190925033423_0076_B.2B<br>CE4_GRAS_PCAMR-C- |
|  | 013_SCI_N_20190925033543_20190925033543_0076_B.2B<br>CE4_GRAS_PCAMR-C- |
|  | 014_SCI_N_20190925034241_20190925034241_0076_B.2B<br>CE4_GRAS_PCAMR-C- |
|  | 015_SCI_N_20190925034401_20190925034401_0076_B.2B<br>CE4_GRAS_PCAMR-C- |
|  | 016_SCI_N_20190925034521_20190925034521_0076_B.2B<br>CE4_GRAS_PCAMR-C- |
|  | 017_SCI_N_20190925034641_20190925034641_0076_B.2B<br>CE4_GRAS_PCAMR-C- |
|  | 018_SCI_N_20190925034801_20190925034801_0076_B.2B<br>CE4_GRAS_PCAMR-C- |
|  | 019_SCI_N_20190925034921_20190925034921_0076_B.2B<br>CE4_GRAS_PCAMR-C- |
|  | 020_SCI_N_20190925035041_20190925035041_0076_B.2B<br>CE4_GRAS_PCAMR-C- |
|  | 021_SCI_N_20190925035201_20190925035201_0076_B.2B<br>CE4_GRAS_PCAMR-C- |
|  | 022_SCI_N_20190925035321_20190925035321_0076_B.2B<br>CE4_GRAS_PCAMR-C- |
|  | 023_SCI_N_20190925035441_20190925035441_0076_B.2B<br>CE4_GRAS_PCAMR-C- |
|  | 024_SCI_N_20190925035601_20190925035601_0076_B.2B<br>CE4_GRAS_PCAMR-C- |
|  | 025_SCI_N_20190925035721_20190925035721_0076_B.2B<br>CE4_GRAS_PCAMR-C- |
|  | 026_SCI_N_20190925035841_20190925035841_0076_B.2B<br>CE4_GRAS_PCAMR-C- |
|  | 027_SCI_N_20190925040001_20190925040001_0076_B.2B<br>CE4_GRAS_PCAMR-C- |
|  | 028_SCI_N_20190925040917_20190925040917_0076_B.2B<br>CE4_GRAS_PCAMR-C- |
|  | 029_SCI_N_20190925041347_20190925041347_0076_B.2B<br>CE4_GRAS_PCAMR-C- |
|  | 030_SCI_N_20190925041507_20190925041507_0076_B.2B<br>CE4_GRAS_PCAMR-C- |
|  | 031_SCI_N_20190925041627_20190925041627_0076_B.2B<br>CE4_GRAS_PCAMR-C- |
|  | 032_SCI_N_20190925041747_20190925041747_0076_B.2B                      |

|                                                          |                                                                                                                                                                                                                                                                                                                                                                                                                                                                                                                                                                                                                                                                                                                                                                                                                                                                                                                                                                                                                                                                                                                                                                                                                                                                                                                                                                                                                                                                                                                                                                                                                                                                                                                                                                                                                                                                     |
|----------------------------------------------------------|---------------------------------------------------------------------------------------------------------------------------------------------------------------------------------------------------------------------------------------------------------------------------------------------------------------------------------------------------------------------------------------------------------------------------------------------------------------------------------------------------------------------------------------------------------------------------------------------------------------------------------------------------------------------------------------------------------------------------------------------------------------------------------------------------------------------------------------------------------------------------------------------------------------------------------------------------------------------------------------------------------------------------------------------------------------------------------------------------------------------------------------------------------------------------------------------------------------------------------------------------------------------------------------------------------------------------------------------------------------------------------------------------------------------------------------------------------------------------------------------------------------------------------------------------------------------------------------------------------------------------------------------------------------------------------------------------------------------------------------------------------------------------------------------------------------------------------------------------------------------|
|                                                          | <p>CE4_GRAS_PCAMR-C-<br/> 033_SCI_N_20190925041907_20190925041907_0076_B.2B<br/> CE4_GRAS_PCAMR-C-<br/> 034_SCI_N_20190925042027_20190925042027_0076_B.2B<br/> CE4_GRAS_PCAMR-C-<br/> 035_SCI_N_20190925042147_20190925042147_0076_B.2B<br/> CE4_GRAS_PCAMR-C-<br/> 036_SCI_N_20190925042307_20190925042307_0076_B.2B<br/> CE4_GRAS_PCAMR-C-<br/> 037_SCI_N_20190925042427_20190925042427_0076_B.2B<br/> CE4_GRAS_PCAMR-C-<br/> 038_SCI_N_20190925042547_20190925042547_0076_B.2B<br/> CE4_GRAS_PCAMR-C-<br/> 039_SCI_N_20190925042707_20190925042707_0076_B.2B<br/> CE4_GRAS_PCAMR-C-<br/> 040_SCI_N_20190925042827_20190925042827_0076_B.2B<br/> CE4_GRAS_PCAMR-C-<br/> 041_SCI_N_20190925042947_20190925042947_0076_B.2B<br/> CE4_GRAS_PCAMR-C-<br/> 042_SCI_N_20190925044042_20190925044042_0076_B.2B<br/> CE4_GRAS_PCAMR-C-<br/> 043_SCI_N_20190925044202_20190925044202_0076_B.2B<br/> CE4_GRAS_PCAMR-C-<br/> 044_SCI_N_20190925044322_20190925044322_0076_B.2B<br/> CE4_GRAS_PCAMR-C-<br/> 045_SCI_N_20190925044442_20190925044442_0076_B.2B<br/> CE4_GRAS_PCAMR-C-<br/> 046_SCI_N_20190925044602_20190925044602_0076_B.2B<br/> CE4_GRAS_PCAMR-C-<br/> 047_SCI_N_20190925044722_20190925044722_0076_B.2B<br/> CE4_GRAS_PCAMR-C-<br/> 048_SCI_N_20190925044842_20190925044842_0076_B.2B<br/> CE4_GRAS_PCAMR-C-<br/> 049_SCI_N_20190925045002_20190925045002_0076_B.2B<br/> CE4_GRAS_PCAMR-C-<br/> 050_SCI_N_20190925045122_20190925045122_0076_B.2B<br/> CE4_GRAS_PCAMR-C-<br/> 051_SCI_N_20190925045242_20190925045242_0076_B.2B<br/> CE4_GRAS_PCAMR-C-<br/> 052_SCI_N_20190925045402_20190925045402_0076_B.2B<br/> CE4_GRAS_PCAMR-C-<br/> 053_SCI_N_20190925045522_20190925045522_0076_B.2B<br/> CE4_GRAS_PCAMR-C-<br/> 054_SCI_N_20190925045642_20190925045642_0076_B.2B<br/> CE4_GRAS_PCAMR-C-<br/> 055_SCI_N_20190925045802_20190925045802_0076_B.2B</p> |
| <p><b>Extended Data Fig. 2</b><br/> <b>PCAM data</b></p> | <p>CE4_GRAS_PCAML-C-<br/> 000_SCI_N_20190827094241_20190827094241_0060_B.2B<br/> CE4_GRAS_PCAML-C-<br/> 001_SCI_N_20190827094410_20190827094410_0060_B.2B<br/> CE4_GRAS_PCAML-C-<br/> 002_SCI_N_20190827094539_20190827094539_0060_B.2B<br/> CE4_GRAS_PCAML-C-</p>                                                                                                                                                                                                                                                                                                                                                                                                                                                                                                                                                                                                                                                                                                                                                                                                                                                                                                                                                                                                                                                                                                                                                                                                                                                                                                                                                                                                                                                                                                                                                                                                  |

|                                                         |                                                                                                                                                                                                                                                                                                                                                                                                                                                                                                                                                                                                                                                                                                                                                                                                                                                                                                                                                                                                                                                                                                                                                                                                                                                                                                                                                                                                                                                                                                                                                                                                                               |
|---------------------------------------------------------|-------------------------------------------------------------------------------------------------------------------------------------------------------------------------------------------------------------------------------------------------------------------------------------------------------------------------------------------------------------------------------------------------------------------------------------------------------------------------------------------------------------------------------------------------------------------------------------------------------------------------------------------------------------------------------------------------------------------------------------------------------------------------------------------------------------------------------------------------------------------------------------------------------------------------------------------------------------------------------------------------------------------------------------------------------------------------------------------------------------------------------------------------------------------------------------------------------------------------------------------------------------------------------------------------------------------------------------------------------------------------------------------------------------------------------------------------------------------------------------------------------------------------------------------------------------------------------------------------------------------------------|
|                                                         | <p>003_SCI_N_20190827094707_20190827094707_0060_B.2B<br/> CE4_GRAS_PCAML-C-<br/> 004_SCI_N_20190827094836_20190827094836_0060_B.2B<br/> CE4_GRAS_PCAML-C-<br/> 005_SCI_N_20190827095005_20190827095005_0060_B.2B<br/> CE4_GRAS_PCAMR-C-<br/> 004_SCI_N_20190729012457_20190729012457_0050_B.2B</p>                                                                                                                                                                                                                                                                                                                                                                                                                                                                                                                                                                                                                                                                                                                                                                                                                                                                                                                                                                                                                                                                                                                                                                                                                                                                                                                            |
| <p><b>Extended Data Fig.<br/> 3a<br/> PCAM data</b></p> | <p>CE4_GRAS_PCAML-C-<br/> 000_SCI_N_20190905071818_20190905071818_0067_B.2B<br/> CE4_GRAS_PCAML-C-<br/> 001_SCI_N_20190905071947_20190905071947_0067_B.2B<br/> CE4_GRAS_PCAML-C-<br/> 002_SCI_N_20190905072116_20190905072116_0067_B.2B<br/> CE4_GRAS_PCAML-C-<br/> 003_SCI_N_20190905072359_20190905072359_0067_B.2B<br/> CE4_GRAS_PCAML-C-<br/> 004_SCI_N_20190905072528_20190905072528_0067_B.2B<br/> CE4_GRAS_PCAML-C-<br/> 005_SCI_N_20190905072657_20190905072657_0067_B.2B<br/> CE4_GRAS_PCAML-C-<br/> 006_SCI_N_20190905081132_20190905081132_0067_B.2B</p>                                                                                                                                                                                                                                                                                                                                                                                                                                                                                                                                                                                                                                                                                                                                                                                                                                                                                                                                                                                                                                                           |
| <p><b>Extended Data Fig. 8</b></p>                      | <p>CE4_GRAS_VNIS-VD_SCI_N_20190923090001_20190923110000_0068_B.2B<br/> CE4_GRAS_VNIS-VD_SCI_N_20190923123001_20190923130000_0069_B.2B<br/> CE4_GRAS_VNIS-VD_SCI_N_20190924021501_20190924035000_0070_B.2B<br/> CE4_GRAS_VNIS-VD_SCI_N_20190924060001_20190924061500_0071_B.2B<br/> CE4_GRAS_VNIS-VD_SCI_N_20190924073001_20190924080000_0072_B.2B<br/> CE4_GRAS_VNIS-VD_SCI_N_20190924094501_20190924101000_0073_B.2B<br/> CE4_GRAS_VNIS-VD_SCI_N_20190924113001_20190924115000_0074_B.2B<br/> CE4_GRAS_VNIS-VD_SCI_N_20190925022001_20190925024000_0075_B.2B<br/> CE4_GRAS_VNIS-VD_SCI_N_20190925030001_20190925054500_0076_B.2B<br/> CE4_GRAS_VNIS-VD_SCI_N_20190925080001_20190925100000_0077_B.2B<br/> CE4_GRAS_VNIS-VD_SCI_N_20190925110001_20190925113000_0078_B.2B<br/> CE4_GRAS_VNIS-VD_SCI_N_20191002030001_20191002043000_0079_B.2B<br/> CE4_GRAS_VNIS-VD_SCI_N_20191002052001_20191002054500_0080_B.2B<br/> CE4_GRAS_VNIS-VD_SCI_N_20191002070001_20191002072000_0081_B.2B<br/> CE4_GRAS_VNIS-VD_SCI_N_20191002083001_20191002090000_0082_B.2B<br/> CE4_GRAS_VNIS-VD_SCI_N_20191002103001_20191002105000_0083_B.2B<br/> CE4_GRAS_VNIS-VD_SCI_N_20191003012001_20191003014500_0084_B.2B<br/> CE4_GRAS_VNIS-VD_SCI_N_20191003033001_20191003050000_0085_B.2B<br/> CE4_GRAS_VNIS-VD_SCI_N_20191003051501_20191003053000_0086_B.2B<br/> CE4_GRAS_VNIS-VD_SCI_N_20191003071001_20191003073000_0087_B.2B<br/> CE4_GRAS_VNIS-VD_SCI_N_20191003090001_20191003092000_0088_B.2B<br/> CE4_GRAS_VNIS-VD_SCI_N_20191003105001_20191003111000_0089_B.2B<br/> CE4_GRAS_VNIS-VD_SCI_N_20191004010001_20191004020000_0090_B.2B</p> |

|                                                       |                                                                                                                                                                                                                                                                                                                                                                                                                                                                                                                                                                                                                                                                                                                                                                                                                                                                                                                                                                                                                                                                                                                                                                                                                                                                                                                                                                                                                            |
|-------------------------------------------------------|----------------------------------------------------------------------------------------------------------------------------------------------------------------------------------------------------------------------------------------------------------------------------------------------------------------------------------------------------------------------------------------------------------------------------------------------------------------------------------------------------------------------------------------------------------------------------------------------------------------------------------------------------------------------------------------------------------------------------------------------------------------------------------------------------------------------------------------------------------------------------------------------------------------------------------------------------------------------------------------------------------------------------------------------------------------------------------------------------------------------------------------------------------------------------------------------------------------------------------------------------------------------------------------------------------------------------------------------------------------------------------------------------------------------------|
| <p><b>Supplementary Fig.<br/>1a<br/>PCAM data</b></p> | <p>CE4_GRAS_PCAML-C-<br/>000_SCI_N_20200227111928_20200227111928_0121_B.2B<br/>CE4_GRAS_PCAML-C-<br/>001_SCI_N_20200227112057_20200227112057_0121_B.2B<br/>CE4_GRAS_PCAML-C-<br/>002_SCI_N_20200227112226_20200227112226_0121_B.2B<br/>CE4_GRAS_PCAML-C-<br/>003_SCI_N_20200227112355_20200227112355_0121_B.2B<br/>CE4_GRAS_PCAML-C-<br/>004_SCI_N_20200227112524_20200227112524_0121_B.2B<br/>CE4_GRAS_PCAML-C-<br/>005_SCI_N_20200227112653_20200227112653_0121_B.2B<br/>CE4_GRAS_PCAML-C-<br/>006_SCI_N_20200227112822_20200227112822_0121_B.2B<br/>CE4_GRAS_PCAML-C-<br/>007_SCI_N_20200227112951_20200227112951_0121_B.2B<br/>CE4_GRAS_PCAML-C-<br/>008_SCI_N_20200227113120_20200227113120_0121_B.2B<br/>CE4_GRAS_PCAML-C-<br/>009_SCI_N_20200227113734_20200227113734_0121_B.2B<br/>CE4_GRAS_PCAML-C-<br/>010_SCI_N_20200227113903_20200227113903_0121_B.2B<br/>CE4_GRAS_PCAML-C-<br/>011_SCI_N_20200227114032_20200227114032_0121_B.2B<br/>CE4_GRAS_PCAML-C-<br/>012_SCI_N_20200227114201_20200227114201_0121_B.2B<br/>CE4_GRAS_PCAML-C-<br/>013_SCI_N_20200227114330_20200227114330_0121_B.2B<br/>CE4_GRAS_PCAML-C-<br/>014_SCI_N_20200227114459_20200227114459_0121_B.2B<br/>CE4_GRAS_PCAML-C-<br/>015_SCI_N_20200227114628_20200227114628_0121_B.2B<br/>CE4_GRAS_PCAML-C-<br/>016_SCI_N_20200227114757_20200227114757_0121_B.2B<br/>CE4_GRAS_PCAML-C-<br/>017_SCI_N_20200227114926_20200227114926_0121_B.2B</p> |
|-------------------------------------------------------|----------------------------------------------------------------------------------------------------------------------------------------------------------------------------------------------------------------------------------------------------------------------------------------------------------------------------------------------------------------------------------------------------------------------------------------------------------------------------------------------------------------------------------------------------------------------------------------------------------------------------------------------------------------------------------------------------------------------------------------------------------------------------------------------------------------------------------------------------------------------------------------------------------------------------------------------------------------------------------------------------------------------------------------------------------------------------------------------------------------------------------------------------------------------------------------------------------------------------------------------------------------------------------------------------------------------------------------------------------------------------------------------------------------------------|

|                                                        |                                                                                                                                                                                                                                                                                                                                                                                                                                                                                                                                                                                                                                                                                                                                                                                                                                                                                                                                                                                                                                                                                                                                                                                        |
|--------------------------------------------------------|----------------------------------------------------------------------------------------------------------------------------------------------------------------------------------------------------------------------------------------------------------------------------------------------------------------------------------------------------------------------------------------------------------------------------------------------------------------------------------------------------------------------------------------------------------------------------------------------------------------------------------------------------------------------------------------------------------------------------------------------------------------------------------------------------------------------------------------------------------------------------------------------------------------------------------------------------------------------------------------------------------------------------------------------------------------------------------------------------------------------------------------------------------------------------------------|
| <p><b>Supplementary Fig.<br/>1c<br/>PCAM data</b></p>  | <p>CE4_GRAS_PCAML-C-<br/>002_SCI_N_20190429144016_20190429144016_0033_B.2B<br/>CE4_GRAS_PCAMR-C-<br/>001_SCI_N_20200131030040_20200131030040_0117_B.2B<br/>CE4_GRAS_PCAML-C-<br/>016_SCI_N_20200227114757_20200227114757_0121_B.2B<br/>CE4_GRAS_PCAML-C-<br/>000_SCI_N_20200428092933_20200428092933_0128_B.2B<br/>CE4_GRAS_PCAML-C-<br/>001_SCI_N_20200428093102_20200428093102_0128_B.2B<br/>CE4_GRAS_PCAML-C-<br/>002_SCI_N_20200428093231_20200428093231_0128_B.2B<br/>CE4_GRAS_PCAML-C-<br/>003_SCI_N_20200428093400_20200428093400_0128_B.2B<br/>CE4_GRAS_PCAML-C-<br/>004_SCI_N_20200428093529_20200428093529_0128_B.2B<br/>CE4_GRAS_PCAML-C-<br/>005_SCI_N_20200428093658_20200428093658_0128_B.2B<br/>CE4_GRAS_PCAML-C-<br/>006_SCI_N_20200428094248_20200428094248_0128_B.2B<br/>CE4_GRAS_PCAML-C-<br/>007_SCI_N_20200428094417_20200428094417_0128_B.2B<br/>CE4_GRAS_PCAML-C-<br/>008_SCI_N_20200428094546_20200428094546_0128_B.2B<br/>CE4_GRAS_PCAML-C-<br/>009_SCI_N_20200428094715_20200428094715_0128_B.2B<br/>CE4_GRAS_PCAML-C-<br/>010_SCI_N_20200428094844_20200428094844_0128_B.2B<br/>CE4_GRAS_PCAML-C-<br/>011_SCI_N_20200428095013_20200428095013_0128_B.2B</p> |
| <p><b>Supplementary Fig.<br/>3<br/>HAZCAM data</b></p> | <p>YSBZZ_20190825_102853_0000_304424877_00c81000.tif<br/>YSBZZ_20190825_122339_0000_304431763_00c81000.tif<br/>YSBZZ_20190825_133602_0000_304436106_00c31000.tif<br/>YSBZZ_20190825_151715_0000_304442179_00c31000.tif<br/>YSBZZ_20190826_091127_0000_304506631_00c81000.tif<br/>YSBZZ_20190826_153912_0000_304529895_00c31000.tif<br/>YSBZZ_20190827_085618_0000_304592121_00c81000.tif<br/>YSBZZ_20190827_111820_0000_304600642_00c81000.tif<br/>YSBZZ_20190828_092855_0000_304617907_00c81000.tif<br/>YSBZZ_20190903_141142_0000_305215833_00c81000.tif<br/>YSBZZ_20190903_165626_0000_305225717_00c31000.tif<br/>YSBZZ_20190903_223504_0000_305246035_00c31000.tif<br/>YSBZZ_20190903_223504_0000_305246035_00c91000.tif<br/>YSBZZ_20190904_113654_0000_305292945_00c81000.tif<br/>YSBZZ_20190904_144933_0000_305304504_00c31000.tif<br/>YSBZZ_20190904_144933_0000_305304504_00c81000.tif<br/>YSBZZ_20190904_184004_0000_305318335_00c31000.tif<br/>YSBZZ_20190904_213343_0000_305328754_00c31000.tif</p>                                                                                                                                                                         |

105 **Supplementary Table 10.**

106 Reflectance spectra of endmembers listed in Supplementary Table 1.

107 This table is provided in a separate excel file, see additional supplementary files.



108 **Supplementary Table 11.**

109 Corrected reflectance of ROIs shown in Fig. 1d and Extended Data Fig. 10.

110 This table is provided in a separate excel file, see additional supplementary files.

111 **References:**

- 112 **69.** Li, S. et al. Widespread hematite at high latitudes of the moon. *Science Advances* 6, eaba1940  
113 (2020).
- 114 **70.** Pieters, C. M., Fischer, E. M., Rode, O. & Basu, A. Optical effects of space weathering: The  
115 role of the finest fraction. *Journal Geophysical Research Planets* **98**, 20817 (1993).
- 116 **71.** Arndt, J. & Von Engelhardt, W. Formation of apollo 17 orange and black glass beads. *Journal*  
117 *Geophysical Research: Solid Earth* **92**, E372–E376 (1987).
- 118 **72.** Roush, T. L. Estimated optical constants of the tagish lake meteorite. *Meteoritics & Planetary*  
119 *Science* **38**, 419–426 (2003).
- 120 **73.** Deer, W., Howie, R. & Zussman, J. *An Introduction to the Rock-Forming Minerals*  
121 (Mineralogical Society of Great Britain and Ireland, London, 2013).
