# Supplementary figures and images for: Impact remnants rich in carbonaceous chondrites detected on the Moon by the Chang’e-4 rover
Source: Springer Nature journal article supplement (doi:10.1038/s41550-021-01530-w), 2021-11-25

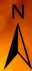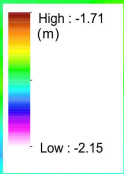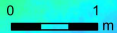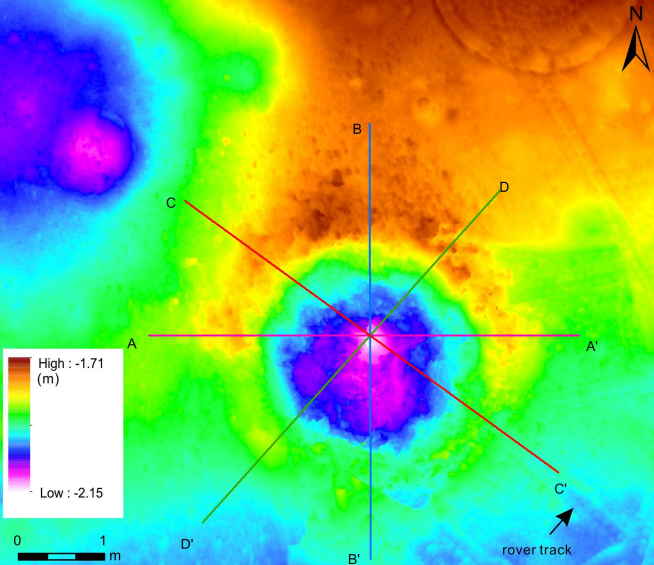

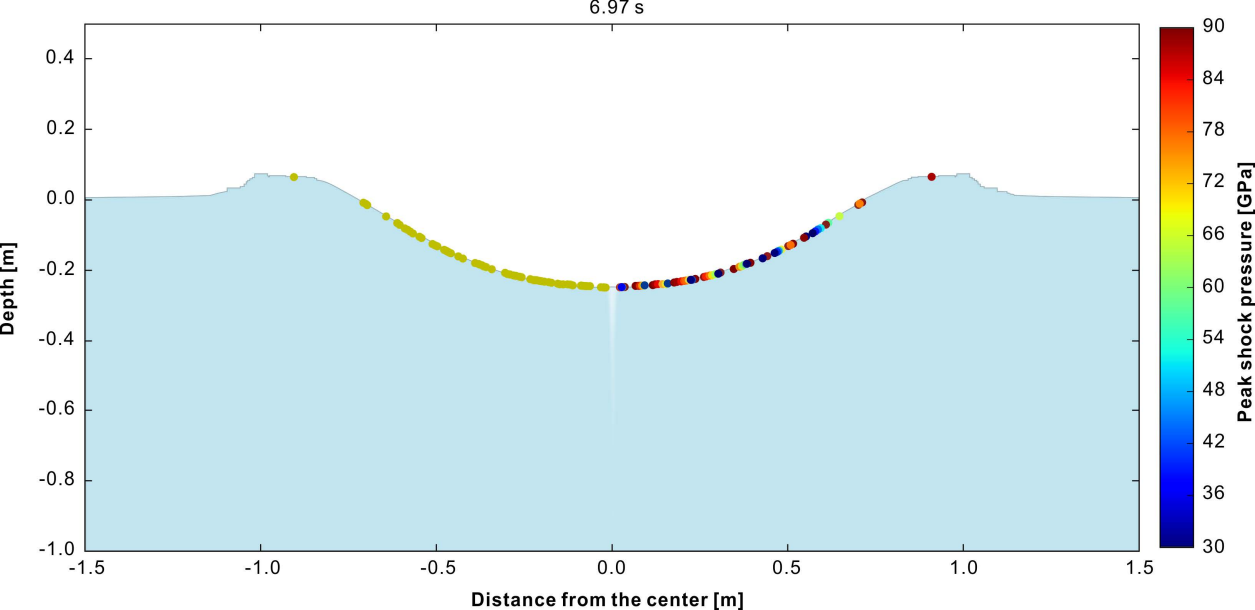

Supplement: 41550_2021_1530_MOESM5_ESM.pdf [file 41550_2021_1530_MOESM5_ESM.pdf]
